# Supplementary material
Source: PubMed Central journal article supplement (PMC3243306)
Supplement: NIHMS294462-supplement-01.pdf [file NIHMS294462-supplement-01.pdf]

Supplementary Figure 1.

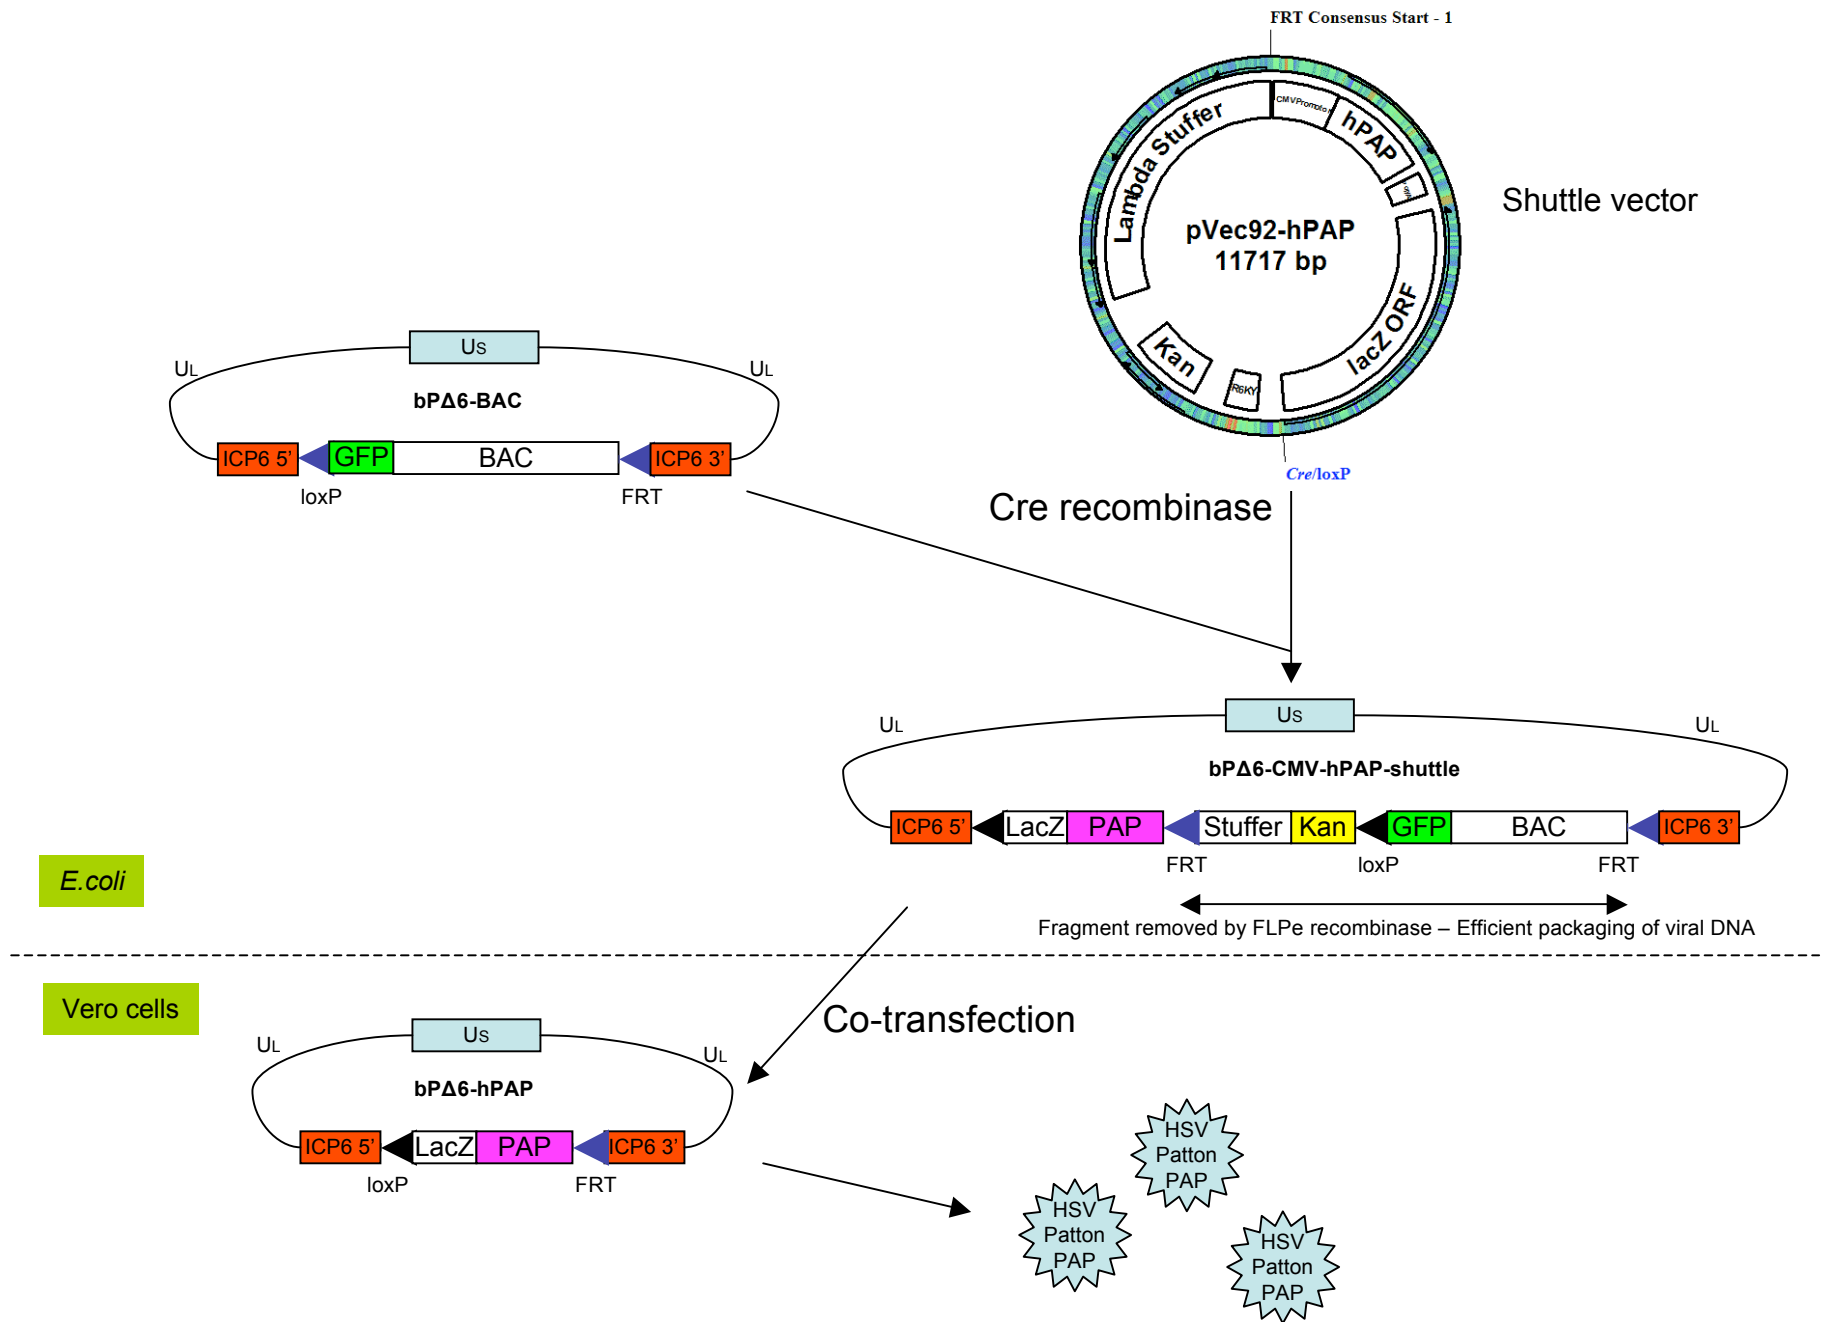

**Supplementary Figure 1. Construction of PAP-expressing oHSV.** Use of the Flip-Flop HSV-BAC system to construct recombinant oHSV vectors is illustrated in this cartoon and has been previously described <sup>7, 26</sup>. Briefly, hPAP cDNA <sup>38</sup> was cloned into the shuttle vector pVec92 to generate pVec92-hPAP. pVec92-hPAP was inserted into bPΔ6-BAC via Cre/LoxP recombination. The bPΔ6-CMV-hPAP-shuttle plasmid was isolated and co-transfected into Vero cells with pCAGGS-Flp, a FLPe-expressing plasmid. Flp/Frt recombination removes the BAC, antibiotic resistance, GFP, and stuffer sequences so the viral genome can be efficiently packaged into virions, and the recombinant virus (bPΔ6-hPAP) harvested and plaque-purified.
